# Supplementary material for: Formic acid enabled selectivity boosting in transfer hydrogenation of 5-hydroxymethylfurfural to 2,5-furandimethanol on highly dispersed Co–Nx sites
Source: Royal Society of Chemistry journal article supplement (doi:10.1039/d0cy01969k), 2020-12-10
Supplement: d0cy01969k1.pdf [file d0cy01969k1.pdf]

Supporting information

# Formic acid enabled selectivity boosting in transfer hydrogenation of 5-hydroxymethylfurfural to 2,5-furandimethanol on highly dispersed Co-N<sub>x</sub> sites

Ling Xu<sup>a</sup>, Renfeng Nie\*<sup>b</sup>, Xujie Chen<sup>a</sup>, Yanchen Li<sup>a</sup>, Yuxi Jiang<sup>a</sup>, Xiuyang Lu\*<sup>a</sup>

<sup>a</sup> Key Laboratory of Biomass Chemical Engineering of Ministry of Education, College of Chemical and Biological Engineering, Zhejiang University, Hangzhou 310027, China

<sup>b</sup> College of Chemical Engineering, Zhengzhou University, Zhengzhou 450001, China

E-mail: [luxiuyang@zju.edu.cn](mailto:luxiuyang@zju.edu.cn); [refinenie@163.com](mailto:refinenie@163.com)

## Experimental Procedures

### Materials

1,10-phenanthroline (99%) was purchased from Innochem, China. Poly(ethylene glycol)-block-poly(propylene glycol)-block-poly(ethylene glycol) (P123, Mn~5800) was purchased from Sigma-Aldrich. FAL (99%), FOL (98%), Co(OAc)<sub>2</sub>·4H<sub>2</sub>O (99.9%), Ni(OAc)<sub>2</sub>·4H<sub>2</sub>O (99.9%), Cu(OAc)<sub>2</sub>·H<sub>2</sub>O (99%), Fe(OAc)<sub>2</sub> (99%), Pt/C (5 wt%), Pd/C (5 wt%), Ru/C (5 wt%), laevulinic acid (99%) were purchased from Aladdin Chemicals. FA (98%), 5-hydroxymethylfurfural (97%), 2,5-furandimethanol (98%), 2,5-dimethylfuran (99%) were purchased from Macklin, China. Tetraethyl orthosilicate (AR), HCl (36.0-38.0%), HF (≥40%), NaOH (AR), 1,4-dioxane (≥99.5%), methanol (≥99.5%), isopropanol (≥99.5%), ethanol (≥99.5%), ethyl acetate (≥99.5%), dichloromethane (≥99.5%), cyclohexane (≥99.5%), DMF (≥99.5%) were purchased from Sinopharm Chemical Reagent Co. Ltd, China. All chemicals were used without any further treatment.

### Catalyst preparation

#### Preparation of SBA-15

Pluronic polymer surfactant P123 was used as structure-directing agent. First, 6 g P123 was dissolved in the 200 g 1.6 M HCl aqueous solution, the resulting solution was stirred at 40°C until the

solution became clear. Then, 12.75 g TEOS was added dropwise into this solution under stirring. The mixture was kept under stirring at 40°C for 12 h. This mixed solution was then transferred into a Teflon-lined autoclave and heated to and kept at 100°C for 24 h. Finally, white precipitates were collected, filtered and washed with water, dried, and calcined at 550°C for 6 h at a heating rate of 4°C/min in a tube furnace to remove the organic template.

### **Preparation of Co-MNC catalysts**

Co-NC-A catalyst was prepared via pyrolysis of the mixture of  $\text{Co}(\text{phen})_2(\text{OAc})_2$  and SBA-15 in nitrogen atmosphere. Typically,  $\text{Co}(\text{OAc})_2 \cdot 4\text{H}_2\text{O}$  (124 mg) and 1,10-phenanthroline monohydrate (198 mg) were added into 25 mL ethanol to form a transparent solution. After that, SBA-15 (0.2495 g) was added and the suspension was sonicated for 10 min. The mixture was stirred at 60 °C overnight. After ethanol was removed by rotary evaporation, the solid was dried, and heated to a 700 °C in  $\text{N}_2$  atmosphere at a heating rate of 2 °C /min and kept for 2 h. The calcinated solid was treated by HF and HCl solution in order to completely remove SBA-15 and soluble cobalt species. The resulting sample was thoroughly washed with DI water until free of  $\text{Co}^{2+}$ , dried and named as Co-NC-A. For comparison, the calcinated solid was soaked with NaOH to remove SBA-15 to give a catalyst abbreviated as Co-NC-B. Replacing cobalt acetate with nickel acetate, ferric acetate or copper acetate gave rise to Ni- NC-A, Fe- NC-A or Cu-NC-A, respectively.

### **Adsorption test**

10 mg of Co-NC-A was added into a 10 mL of HMF dioxane solution with an initial concentration of 4.6 $\mu\text{g}/\text{mL}$  and stirred for 1h. The supernatant was then obtained by centrifugation and analyzed by a Agilent 8453 Ultraviolet-visible Spectrophotometer. The amount of adsorbed HMF was calculated according to the equation: the amount of adsorbed HMF =  $(c_0 - c_r) \times V_0 / m_c$ . Here  $c_0$  is the initial concentration of HMF,  $c_r$  is the residual HMF concentration after adsorption,  $V_0$  is the volume of solution, and  $m_c$  is the mass of catalyst. Replacing HMF with FDM gave rise to the adsorption test of FDM.

### **Characterizations**

Powder X-ray diffraction (XRD) was carried out with Ni-filtered  $\text{Cu K}\alpha$  ( $\lambda=0.154$  nm) operating

at 40 kV and 30 mA on a Bruker D8 diffractometer. N<sub>2</sub> adsorption was carried out at 77 K using an auto-adsorption analyzer (Micromeritics, 3Flex). Transmission electron microscope (TEM) images were obtained using an accelerating voltage of 200 kV on a JEOL 2100F Transmission Electron Microscope. X-ray photoelectron spectra (XPS) were recorded on a Thermo Scientific ESCALab 250Xi employing a 200 W monochromatic Al K $\alpha$  radiation ( $h\nu=1486.6$  eV). C1s at 284.6 eV was used for calibrating the XPS spectra. H<sub>2</sub>-TPD was measured by a FineSorb-3010 equipped with a thermal conductivity detector (TCD, Zhejiang Finetec Instruments Co., Ltd) in the temperature range of 50-500 °C at a ramping rate of 10 °C /min.

### **Catalytic reactions**

The reactions were carried out in an autoclave (8 mL) purchased from Zhengxin, China. In a typical run, 30 mg HMF, 20 mg catalyst, a certain amount of FA and 3.5 mL solvent were added into the autoclave. The sealed autoclave was purged, pressurized with N<sub>2</sub> to 0.5 MPa and heated to the treatment temperature under magnetic stirring (500 rpm). After the completion of reaction, the autoclave was quickly soaked within cold water. The liquid was diluted with methanol. The products and substrate were analyzed by high performance liquid chromatography (HPLC). The catalyst was successively washed by methanol for 3 times and then dried at 60°C for 12 h. The recovered catalyst was submitted to the next batch of reaction.

### **Analysis method**

HMF, FDM, FA and other by-products were quantitatively analyzed via high performance liquid chromatography (HPLC, Agilent 1100) with a column (Aminex HPX-87H, 300 mm $\times$ 7.8 mm I.D., Bio-Rad Laboratories, Inc.). The flow rate of mobile phase (5 mmol/L H<sub>2</sub>SO<sub>4</sub>) was 0.4 mL/min. The temperature of the column and the RID were 60 °C and 35 °C, respectively. Reactant mole conversions were obtained as the number of moles of reactant consumed divided by the initial number of moles of reactant added to the reactor. Selectivity was calculated by the number of moles of product recovered divided by the number of moles of reactant reacted. A quantitative analysis was performed using calibration curves for every compound in the mixture. All data were calculated by the average of three replicate experiments.

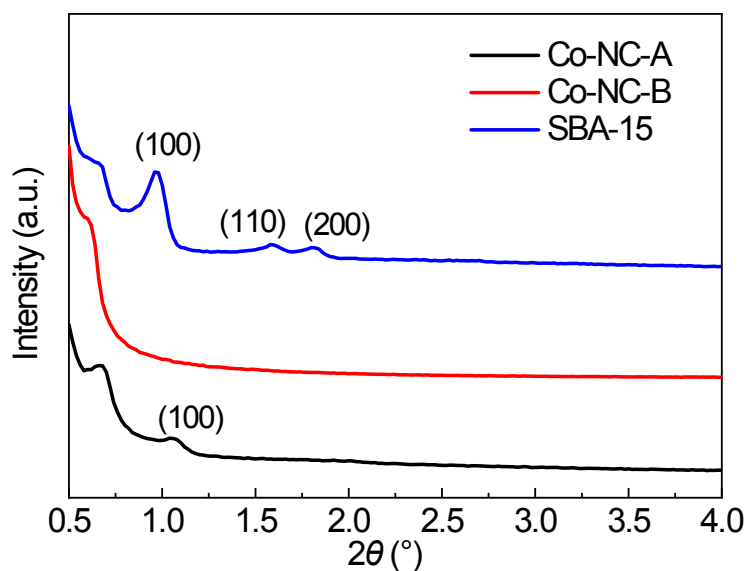

**Fig. S1** SAXRD patterns of Co-NCs.

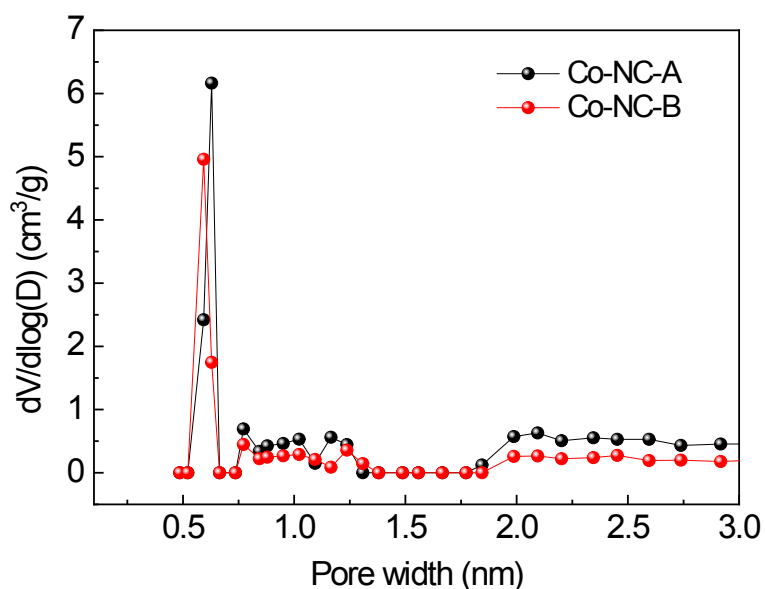

**Fig. S2** Pore size distribution of Co-NCs.

**Table S1** Physical properties of the Co-NCs.

| Catalyst   | Loading (wt%) <sup>a</sup> | $S_{\text{BET}}$ (m <sup>2</sup> /g) <sup>b</sup> | V (cm <sup>3</sup> /g) <sup>b</sup> | D (nm) <sup>b</sup> |
|------------|----------------------------|---------------------------------------------------|-------------------------------------|---------------------|
| Co-NC-A    | 2.8                        | 883.5                                             | 0.3                                 | 2.56                |
| Co-NC-B    | 21.5                       | 610.6                                             | 0.2                                 | 2.77                |
| Co-NC-A(H) | 2.4                        | -                                                 | -                                   | -                   |

<sup>a</sup> Detected by ICP-OES analysis.

<sup>b</sup> Detected by N<sub>2</sub> adsorption/desorption.

**Table S2** Fitting parameters of Co 2p and N1s spectra for the Co-NCs.

| Catalyst | Co <sup>0</sup> | Co <sup>3+</sup> | Co <sup>2+</sup> | Pyridinic N | Pyridinic N-Co + pyrrolic N | Graphitic N | Pyridinic N oxide |
|----------|-----------------|------------------|------------------|-------------|-----------------------------|-------------|-------------------|
| Co-NC-A  | 7.6             | 42.6             | 38.7             | 33.3        | 41.9                        | 16.6        | 8.1               |
| Co-NC-B  | 0.6             | 58.8             | 40.6             | 31.7        | 52.3                        | 9.0         | 7.0               |

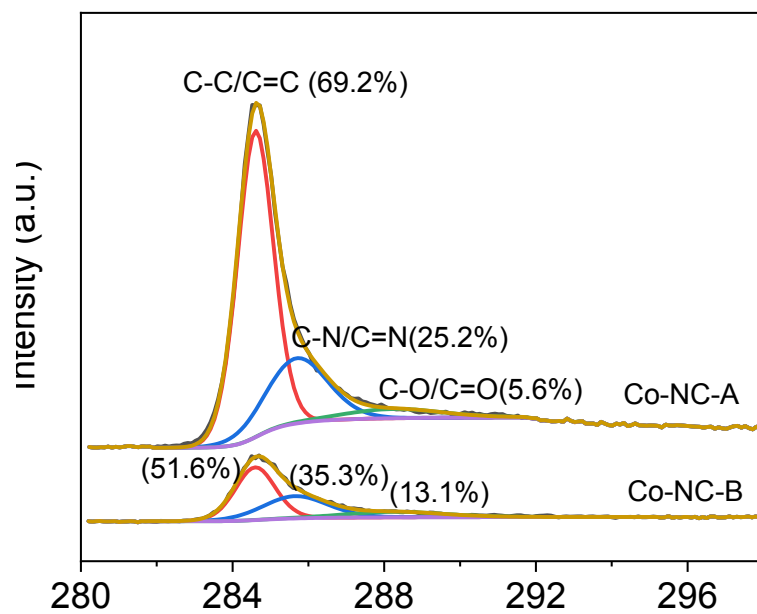

Fig. S3 C1s spectra of Co-NC-A and Co-NC-B catalysts.

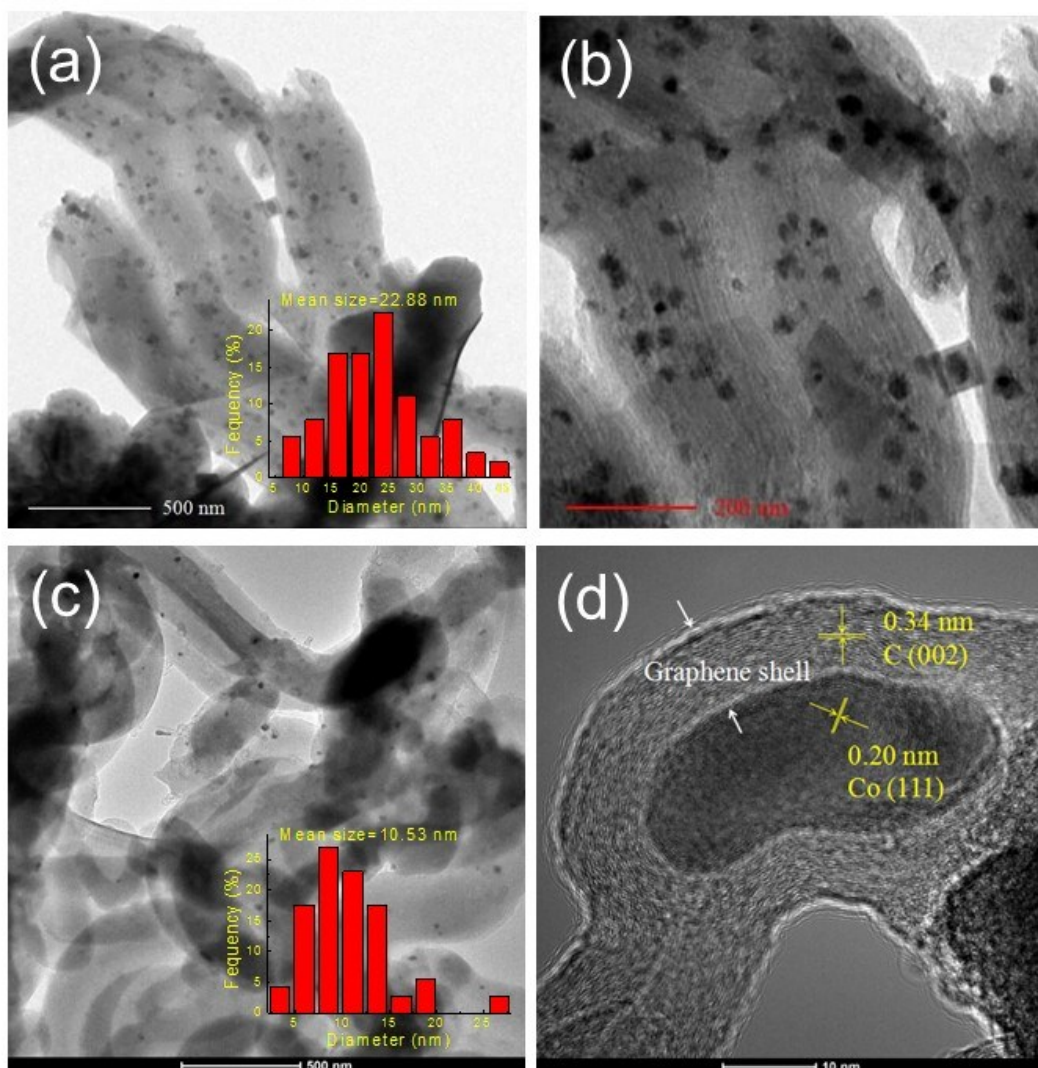

Fig. S4 TEM images of (a, b) Co-NC-B and (c, d) Co-NC-A.

**Table S3** Representative works for FDA production from HMF.

| Catalysts                             | Hydrogen donor | Reaction conditions                                                                                                                        | Yield (%)                            | Ref.       |
|---------------------------------------|----------------|--------------------------------------------------------------------------------------------------------------------------------------------|--------------------------------------|------------|
| Co-NC-A                               | Formic acid    | HMF (30 mg), catalyst (20 mg), $n_{FA/HMF}=7.5$ , 1,4-dioxane (3.5 mL), 0.5 MPa N <sub>2</sub> , <b>160 °C</b> , 10 h, 500 rpm             | 86.0%                                | This study |
| Pd/C                                  | Formic acid    | HMF (0.25 g, 2 mmol), formic acid (0.31 mL, 8 mmol), 0.2 g catalyst, 15 mL THF, heated at reflux for 4 h.                                  | 94%                                  | 1          |
| Homogeneous Ir catalyst               | Formic acid    | Formic acid (0.088 mL, 2.0 mmol), HMF (0.25 g, 2.0 mmol), 3 mL THF, <b>40°C</b> .                                                          | 94%                                  | 2          |
| Au/Al <sub>2</sub> O <sub>3</sub>     | H <sub>2</sub> | 0.4 mmol HMF, 10 mg catalyst, 6.5 MPa H <sub>2</sub> , 2 mL water, <b>140°C</b> , 2 h.                                                     | >96.0%                               | 3          |
| Ru(OH) <sub>x</sub> /ZrO <sub>2</sub> | H <sub>2</sub> | HMF (100 μL, 0.97 mmol), catalyst (15 mg, 0.3 mol%), 15 bar H <sub>2</sub> , 3 mL 1-butanol, <b>120°C</b> , 6 h.                           | >99%                                 | 4          |
| Ru/C                                  | H <sub>2</sub> | <b>140-170°C</b> , H <sub>2</sub> (0.69-2.07 MPa), water, HMF concentration (19.8-59.5 mM), catalyst loading (0.3-0.7 kg/m <sup>3</sup> ). | n.a.(the study of reaction kinetics) | 5          |
| Sn-β                                  | Isopropanol    | 160 mg HMF, 80 mg catalyst, 16 mL isopropanol, <b>180°C</b> , 6 h, 20.4 bar N <sub>2</sub> .                                               | >80% (2,5-bis(alkoxymethyl)furan)    | 6          |
| ZrBa(3)-SBA                           | Isopropanol    | 0.2 g HMF, 19.8 g isopropanol, <b>150°C</b> , 2.5 h, 500 rpm, 1 atm N <sub>2</sub> .                                                       | 90.6%                                | 7          |
| Ru/Co <sub>3</sub> O <sub>4</sub>     | Isopropanol    | 0.5 wt % HMF, 0.25 wt % Ru/Co <sub>3</sub> O <sub>4</sub> and 20 mL isopropanol, <b>190°C</b> , 6 h.                                       | 82%                                  | 8          |
| ZrO(OH) <sub>2</sub>                  | Ethanol        | 1 g HMF, 0.5 g catalyst, 39 g ethanol, <b>150°C</b> , 2.5 h, 1 atm N <sub>2</sub> .                                                        | 83.7%                                | 9          |

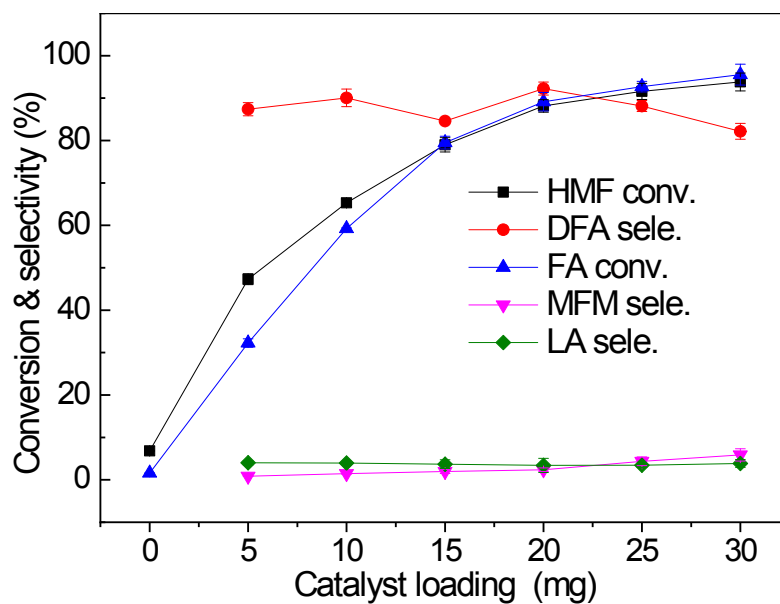

**Fig. S5** Effect of catalyst loading on CTH of HMF over Co-NC-A. Reaction conditions: HMF (30 mg),  $n_{\text{FA/HMF}}=7.5$ , 1,4-dioxane (3.5 mL), 0.5 MPa  $\text{N}_2$ , 160 °C, 5 h, 500 rpm.

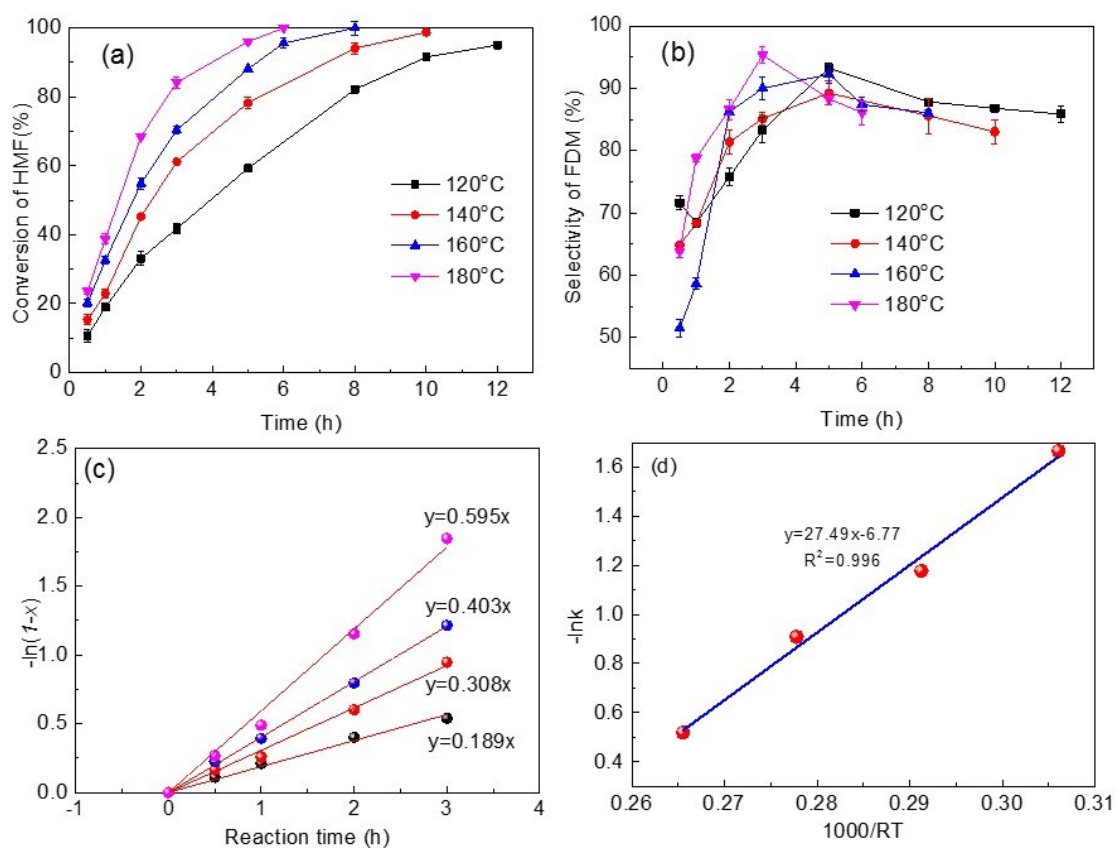

**Fig. S6** Time-temperature-activity profiles for (a-d) HMF conversion. Reaction conditions: HMF (30 mg), Co-NC-A (20 mg),  $n_{\text{FA/HMF}}=7.5$ , 1,4-dioxane (3.5 mL), 0.5 MPa  $\text{N}_2$ , 500 rpm.

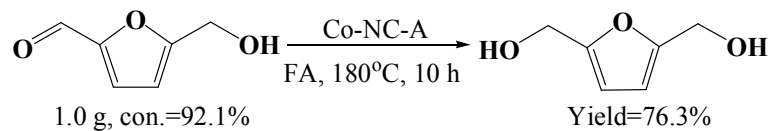

**Fig. S7** Gram-scale CTH of HMF over Co-NC-A. Reaction conditions: HMF (1 g), Co-NC-A (500 mg), FA (1.5 ml), 1,4-dioxane (40 mL), 0.5 MPa N<sub>2</sub>, 180 °C, 10 h, 500 rpm.

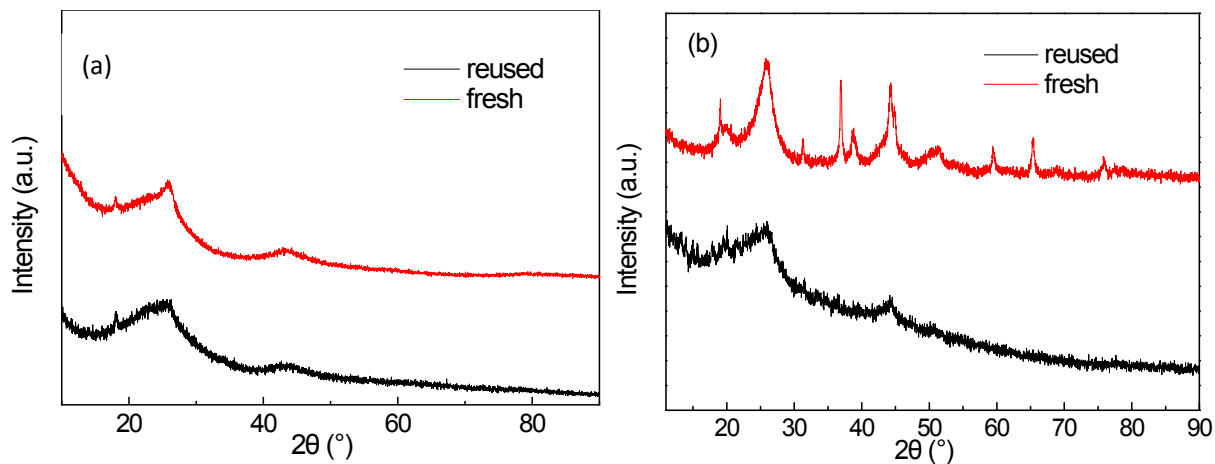

**Fig. S8** XRD patterns of fresh and reused Co-NC-A(a) and Co-NC-B(b).

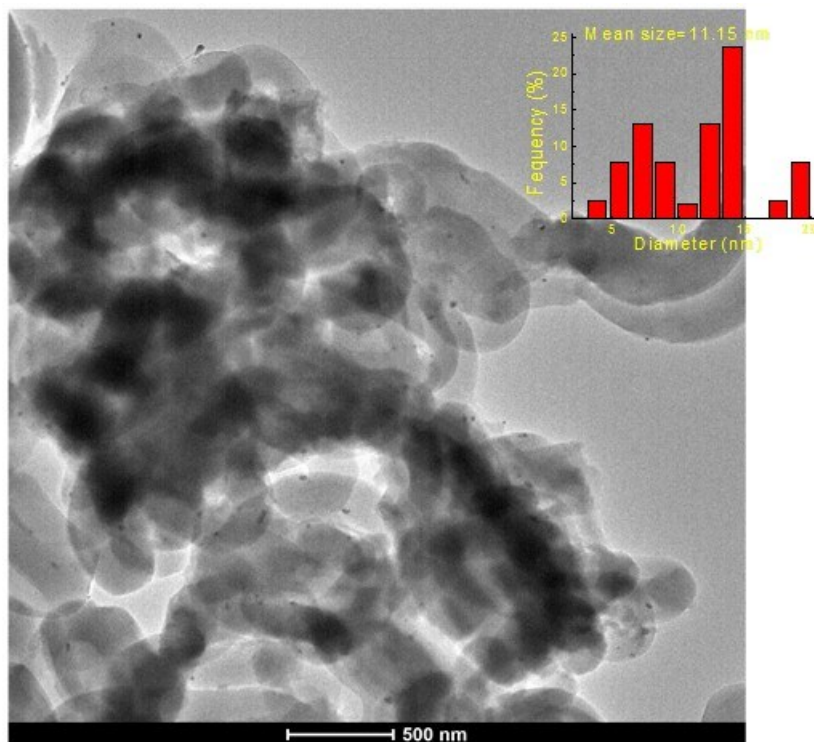

**Fig. S9** TEM image of 5 times reused Co-NC-A.



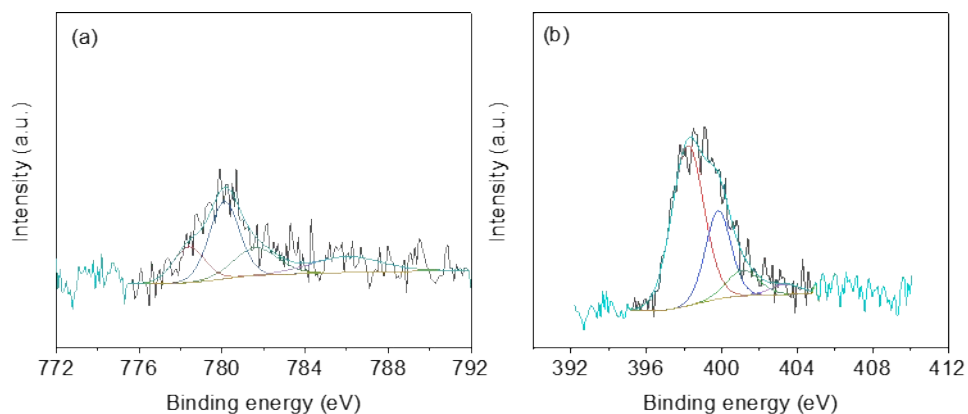

**Fig. S10** (a) Co2p and (b) N1S spectra of reused Co-NC-A.

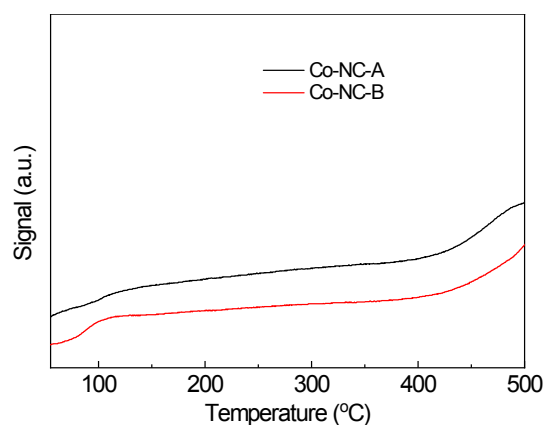

**Fig. S11** HN<sub>3</sub>-TPD profiles of Co-NC-A and Co-NC-B.

**Table S4** Comparison of CTH performance over Co-NC-A and Co-NC-B.

| Catalysts | t(h) | Co species (mg) |           | Conversion /% | Selec. of FDM/% |
|-----------|------|-----------------|-----------|---------------|-----------------|
|           |      | soluble         | insoluble |               |                 |
| Co-NC-B   | 2    | 3.85            | 0.45      | 58.1          | 86.5            |
| Co-NC-B   | 5    |                 |           | 95.2          | 89.7            |
| Co-NC-A   | 2    | 0               | 0.56      | 54.9          | 86.2            |
| Co-NC-A   | 5    |                 |           | 88.2          | 92.2            |

Reaction conditions: HMF (30 mg), catalyst (20 mg),  $n_{\text{FA}/\text{HMF}}=7.5$ , 1,4-dioxane (3.5 mL), 0.5 MPa N<sub>2</sub>, 160 °C, 500 rpm

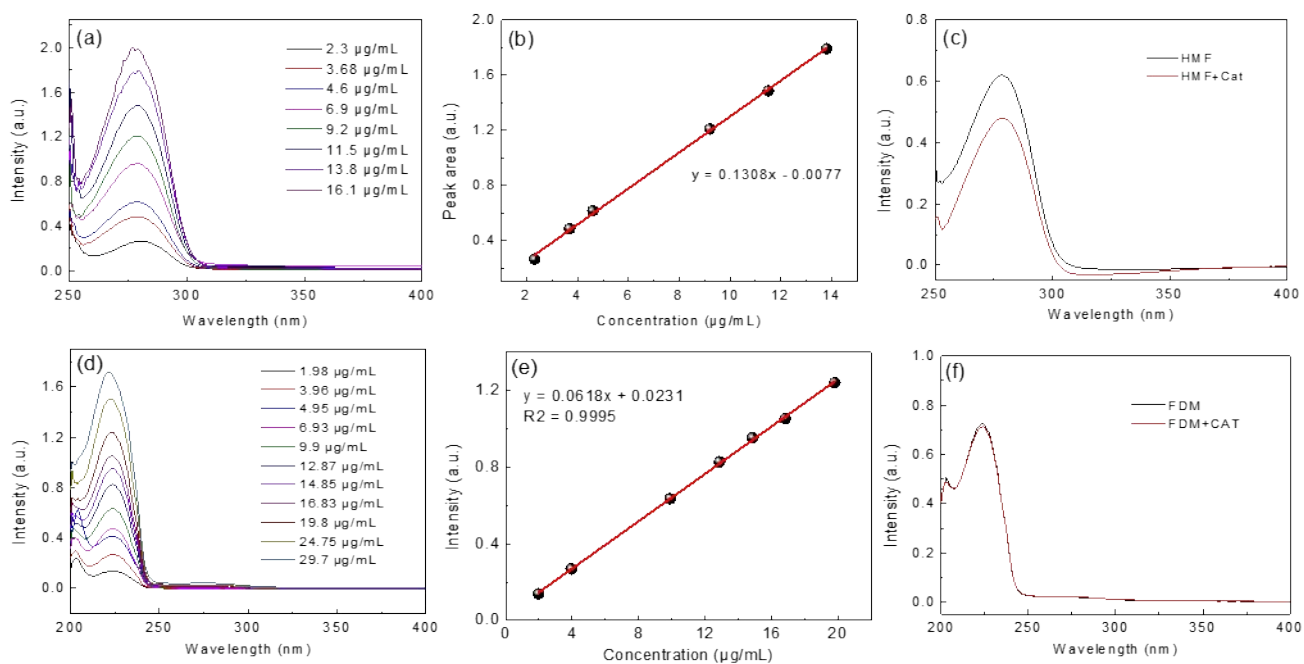

**Fig. S12** (a-c) HMF and (d-f) FDM adsorption over Co-NC-A

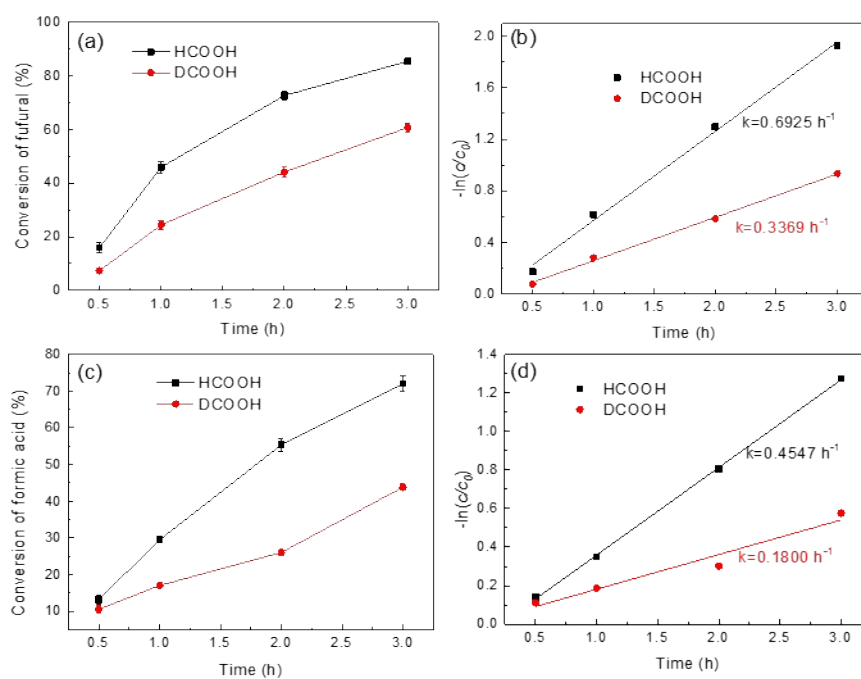

**Fig. S13** KIE studies of (a and b) furfural and (c and d) FA conversions over Co-NC-A. Reaction conditions: FAL (0.73 mmol), catalyst (25 mg), FA/FAL=3.5(mole ratio), 1,4-dioxane (3.5 mL), 0.5 MPa N<sub>2</sub>, 150 °C.

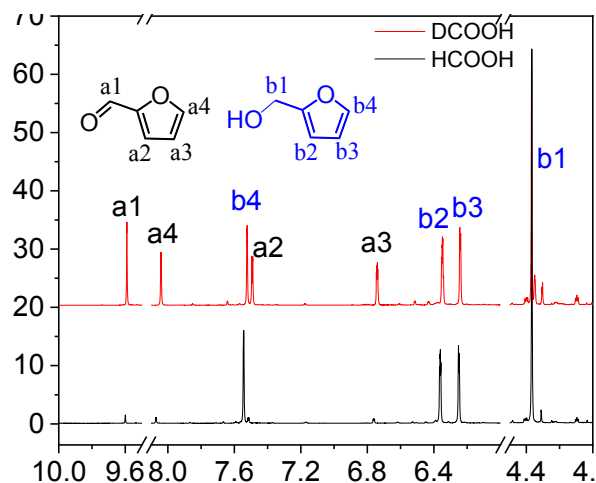

**Fig. S14**  $^1\text{H}$ -NMR spectra of reaction mixture using HCOOH and DCOOH as hydrogen donor.

## References

1. T. Thananattachon and T. B. Rauchfuss, *Angew. Chem.-Int. Edit.*, 2010, **49**, 6616-6618.
2. T. Thananattachon and T. B. Rauchfuss, *ChemSusChem*, 2010, **3**, 1139-1141.
3. J. Ohya, A. Esaki, Y. Yamamoto, S. Arai and A. Satsuma, *RSC Adv.*, 2013, **3**, 1033-1036.
4. J. Han, Y.-H. Kim, H.-S. Jang, S.-Y. Hwang, J. Jegal, J. W. Kim and Y.-S. Lee, *Rsc Adv.*, 2016, **6**, 93394-93397.
5. A. B. Jain and P. D. Vaidya, *Int. J. Chem. Kinet.*, 2016, **48**, 318-328.
6. J. Jae, E. Mahmoud, R. F. Lobo and D. G. Vlachos, *ChemCatChem*, 2014, **6**, 508-513.
7. J. Wei, X. Cao, T. Wang, H. Liu, X. Tang, X. Zeng, Y. Sun, T. Lei, S. Liu and L. Lin, *Catal. Sci. Technol.*, 2018, **8**, 4474-4484.
8. T. Wang, J. Zhang, W. Xie, Y. Tang, D. Guo and Y. Ni, *Catalysts*, 2017, **7**, 92.
9. W. Hao, W. Li, X. Tang, X. Zeng, Y. Sun, S. Liu and L. Lin, *Green Chem.*, 2016, **18**, 1080-1088.
